# Supplementary material
Source: MDPI journal article supplement (https://www.mdpi.com/2073-4441/13/22/3166)
Supplement: s1 [file s1]

Supplement

# Growth and nutrient uptake characteristics of *Heterosigma akashiwo* (Raphidophyceae) under nitrogen and phosphorus concentrations in the East China Sea

Anqiang Yang<sup>1</sup>, Richard G. J. Bellerby<sup>1,2\*</sup>, Yanna Wang<sup>1</sup>, Xiaoshuang Li<sup>1</sup>

<sup>1</sup> State Key Laboratory of Estuarine and Coastal Research, East China Normal University, Shanghai, China; yanganqiang0426@126.com (A. Y.); ynwang@sklec.ecnu.edu.cn (Y. W.); 18717822550@163.com (X. L.)

<sup>2</sup> Norwegian Institute for Water Research, Bergen, Norway; Richard.Bellerby@niva.no

\* Correspondence: Richard.Bellerby@niva.no

**Table S1. Artificial seawater recipe [1].**

| Component                                | stock solution [g L <sup>-1</sup> ] | Final concentration in media | supplier                   |
|------------------------------------------|-------------------------------------|------------------------------|----------------------------|
| <b>Salt solution I – anhydrous salts</b> |                                     |                              |                            |
| NaCl                                     | 21.19                               | 363 mM                       | Greagent, Shanghai, China  |
| Na <sub>2</sub> SO <sub>4</sub>          | 3.55                                | 25.0 mM                      | Greagent, Shanghai, China  |
| KCl                                      | 0.599                               | 8.04 mM                      | Greagent, Shanghai, China  |
| NaHCO <sub>3</sub>                       | 0.174                               | 2.07 mM                      | RichJoint, Shanghai, China |
| KBr                                      | 0.0863                              | 725 µM                       | RichJoint, Shanghai, China |
| H <sub>3</sub> BO <sub>3</sub>           | 0.0230                              | 372 µM                       | RichJoint, Shanghai, China |
| NaF                                      | 0.0028                              | 65.7 µM                      | Macklin, Shanghai, China   |
| <b>Salt solution II –hydrated salts</b>  |                                     |                              |                            |
| MgCl <sub>2</sub> ·6H <sub>2</sub> O     | 9.592                               | 41.2 mM                      | Greagent, Shanghai, China  |
| CaCl <sub>2</sub> ·2H <sub>2</sub> O     | 1.344                               | 9.14 mM                      | Greagent, Shanghai, China  |
| SrCl <sub>2</sub> ·6H <sub>2</sub> O     | 0.0218                              | 82 µM                        | Greagent, Shanghai, China  |

**Table S2. Silicon-free f/2 media [2].**

| Component                                                                    | Stock Solution [g L <sup>-1</sup> ] | Final concentration in media | Supplier                  |
|------------------------------------------------------------------------------|-------------------------------------|------------------------------|---------------------------|
| <b>Major nutrient I-nitrate [1 mL/L]</b>                                     |                                     |                              |                           |
| NaNO <sub>3</sub>                                                            | 75                                  | 882 µM                       | Greagent, Shanghai, China |
| <b>Major nutrient II-phosphate [1 mL L<sup>-1</sup>]</b>                     |                                     |                              |                           |
| NaH <sub>2</sub> PO <sub>4</sub> ·H <sub>2</sub> O                           | 5                                   | 36.2 µM                      | Greagent, Shanghai, China |
| <b>Metal stock I-iron [1 mL L<sup>-1</sup>]</b>                              |                                     |                              |                           |
| FeCl <sub>3</sub> ·6H <sub>2</sub> O                                         | 3.15                                | 11.7 µM                      | Greagent, Shanghai, China |
| Na <sub>2</sub> EDTA·2H <sub>2</sub> O                                       | 4.36                                | 11.7 µM                      | Greagent, Shanghai, China |
| <b>Metal stock II-trace metals [1 mL L<sup>-1</sup> add to Mtal stock I]</b> |                                     |                              |                           |
| CuSO <sub>4</sub> ·5H <sub>2</sub> O                                         | 9.8                                 | 0.0393 µM                    | Greagent, Shanghai, China |
| ZnSO <sub>4</sub> ·7H <sub>2</sub> O                                         | 22                                  | 0.0765 µM                    | Greagent, Shanghai, China |
| CoCl <sub>2</sub> ·6H <sub>2</sub> O                                         | 10                                  | 0.042 µM                     | Greagent, Shanghai, China |
| MnCl <sub>2</sub> ·4H <sub>2</sub> O                                         | 180                                 | 0.91 µM                      | Greagent, Shanghai, China |

|                                                     |       |          |                            |
|-----------------------------------------------------|-------|----------|----------------------------|
| Na <sub>2</sub> MoO <sub>4</sub> ·2H <sub>2</sub> O | 6.3   | 0.026 μM | Greagent, Shanghai, China  |
| <b>Vitamin stock [1 mL L<sup>-1</sup>]</b>          |       |          |                            |
| Thiamine-HCl                                        | 0.1   | 297 nM   | RichJoint, Shanghai, China |
| Biotin                                              | 0.002 | 4.09 nM  | RichJoint, Shanghai, China |
| B12                                                 | 0.001 | 1.47 nM  | RichJoint, Shanghai, China |

**Table S3.** *P*-values of one-way ANOVA analysis of cell densities between different nutrient scenarios. Significant values were marked in bold and \*.

| Time  | HNHP-HNLP         | HNHP-LNHP     | HNHP-LNLP         | HNLP-LNHP         | HNLP-LNLP     | LNHP-LNLP         |
|-------|-------------------|---------------|-------------------|-------------------|---------------|-------------------|
| Day 0 | 0.656             | 0.746         | 0.856             | 0.902             | 0.790         | 0.886             |
| Day 1 | 0.885             | 0.287         | 0.914             | 0.351             | 0.971         | 0.334             |
| Day 2 | 0.332             | 0.097         | 0.220             | 0.421             | 0.774         | 0.596             |
| Day 3 | 0.297             | 0.655         | 0.351             | 0.491             | 0.850         | 0.613             |
| Day 4 | 0.686             | 0.411         | 0.430             | 0.666             | 0.247         | 0.128             |
| Day 5 | <b>&lt;0.001*</b> | <b>0.033*</b> | <b>&lt;0.001*</b> | <b>0.029*</b>     | <b>0.013*</b> | <b>&lt;0.001*</b> |
| Day 6 | <b>0.004*</b>     | 0.139         | <b>0.006*</b>     | <b>0.045*</b>     | 0.756         | 0.075             |
| Day 7 | <b>0.001*</b>     | 0.533         | <b>&lt;0.001*</b> | <b>&lt;0.001*</b> | 0.916         | <b>&lt;0.001*</b> |
| Day 8 | <b>0.007*</b>     | <b>0.060*</b> | <b>0.002*</b>     | 0.207             | 0.422         | 0.057             |
| Day 9 | <b>0.005*</b>     | 0.399         | <b>0.003*</b>     | <b>0.001*</b>     | 0.681         | <b>&lt;0.001*</b> |

**Table S4.** Results of two-way ANOVAs of the effects of nitrate (N) and phosphate (P) and their dual effect on cell densities. Significant values were marked in bold and \*.

| Time  | N        |               | P        |                   | N+P      |          |
|-------|----------|---------------|----------|-------------------|----------|----------|
|       | <i>F</i> | <i>P</i>      | <i>F</i> | <i>P</i>          | <i>F</i> | <i>P</i> |
| Day 0 | 0.002    | 0.967         | 0.049    | 0.83              | 0.186    | 0.678    |
| Day 1 | 0.607    | 0.458         | 0.386    | 0.552             | 0.692    | 0.430    |
| Day 2 | 2.372    | 0.162         | 0.115    | 0.743             | 1.254    | 0.295    |
| Day 3 | 0.036    | 0.854         | 1.467    | 0.260             | 0.218    | 0.653    |
| Day 4 | 0.073    | 0.793         | 0.819    | 0.392             | 2.243    | 0.173    |
| Day 5 | 16.638   | <b>0.003*</b> | 61.18    | <b>&lt;0.001*</b> | 0.197    | 0.669    |
| Day 6 | 0.870    | 0.378         | 18.327   | <b>0.002*</b>     | 1.925    | 0.203    |
| Day 7 | 0.147    | 0.712         | 56.68    | <b>&lt;0.001*</b> | 0.289    | 0.605    |
| Day 8 | 4.621    | 0.064         | 16.736   | <b>0.003*</b>     | 0.906    | 0.369    |
| Day 9 | 0.108    | 0.751         | 40.589   | <b>&lt;0.001*</b> | 0.867    | 0.379    |

**Table S5.** Exponential growth rates (μ, d<sup>-1</sup>) of *Heterosigma akashiwo* from references.

| Salinity (PSU) | Temp (°C) | Light (μmol m <sup>-2</sup> s <sup>-1</sup> ) | Nitrate (μmol L <sup>-1</sup> ) | Phosphate (μmol L <sup>-1</sup> ) | Grow rate (d <sup>-1</sup> ) | References    |
|----------------|-----------|-----------------------------------------------|---------------------------------|-----------------------------------|------------------------------|---------------|
| 31             | 20        | 200                                           | 30                              | 1                                 | 0.46±0.05                    | Present study |
| 31             | 20        | 200                                           | 30                              | 0.5                               | 0.37±0.02                    |               |
| 31             | 20        | 200                                           | 15                              | 1                                 | 0.44±0.02                    |               |
| 31             | 20        | 200                                           | 15                              | 0.5                               | 0.34±0.01                    |               |

|    |    |     |            |      |             |     |
|----|----|-----|------------|------|-------------|-----|
| 30 | 10 | 60  |            |      | 0.36±0.068  |     |
| 30 | 15 | 60  |            |      | 0.385±0.05  |     |
| 30 | 20 | 60  |            |      | 0.55±0.24   |     |
| 30 | 25 | 60  |            |      | 1.01±0.02   |     |
| 30 | 30 | 60  | PES medium |      | 0.74±0.10   | [3] |
| 30 | 25 | 10  |            |      | 0.41±0.001  |     |
| 30 | 25 | 50  |            |      | 0.01±0.082  |     |
| 30 | 25 | 100 |            |      | 1.14±0.013  |     |
| 30 | 25 | 150 |            |      | 0.68±0.068  |     |
| 30 | 25 | 200 |            |      | 0.391±0.011 |     |
| 20 | 24 | 60  | NA         | NA   | 0.66±0.03   |     |
| 25 | 24 | 60  | NA         | NA   | 0.68±0.02   |     |
| 30 | 24 | 60  | NA         | NA   | 0.63±0.03   | [4] |
| 35 | 24 | 60  | NA         | NA   | 0.60±0.03   |     |
| 40 | 24 | 60  | NA         | NA   | 0.48±0.02   |     |
| 31 | 20 | 60  | 882        | 36   | 0.35±0.05   | [5] |
| 30 | 20 | 75  | 882        | 36   | 0.80        |     |
| 30 | 20 | 20  | 882        | 36   | 0.15        |     |
| 30 | 20 | 70  | 882        | 36   | 0.53        |     |
| 30 | 20 | 100 | 882        | 36   | 0.78        |     |
| 30 | 20 | 200 | 882        | 36   | 0.81        |     |
| 30 | 20 | 600 | 882        | 36   | 0.85        |     |
| 30 | 20 | 100 | 1          | 36   | 0.54        |     |
| 30 | 20 | 100 | 5          | 36   | 0.64        |     |
| 30 | 20 | 100 | 10         | 36   | 0.65        |     |
| 30 | 20 | 100 | 50         | 36   | 0.68        | [6] |
| 30 | 20 | 100 | 100        | 36   | 0.71        |     |
| 30 | 20 | 100 | 200        | 36   | 0.68        |     |
| 30 | 20 | 100 | 882        | 0.1  | 0.21        |     |
| 30 | 20 | 100 | 882        | 0.3  | 0.55        |     |
| 30 | 20 | 100 | 882        | 0.6  | 0.66        |     |
| 30 | 20 | 100 | 882        | 3    | 0.78        |     |
| 30 | 20 | 100 | 882        | 6    | 0.77        |     |
| 30 | 20 | 100 | 882        | 20   | 0.78        |     |
| 31 | 15 | 40  | 50         | 36.2 | 0.82±0.04   |     |
| 31 | 15 | 110 | 50         | 36.2 | 0.46±0.08   |     |
| 31 | 15 | 25  | 882        | 36.2 | 0.25±0.10   |     |
| 31 | 15 | 50  | 882        | 36.2 | 0.44±0.05   |     |
| 31 | 15 | 80  | 882        | 36.2 | 0.80±0.05   | [7] |
| 31 | 15 | 110 | 882        | 36.2 | 0.90±0.05   |     |
| 31 | 15 | 140 | 882        | 36.2 | 0.87±0.10   |     |
| 31 | 15 | 175 | 882        | 36.2 | 0.84±0.10   |     |
| 31 | 15 | 200 | 882        | 36.2 | 0.85±0.12   |     |
| 23 | 20 | 100 | 882        | 36.2 | 0.55±0.08   | [8] |

|    |    |     |      |      |           |      |
|----|----|-----|------|------|-----------|------|
| 23 | 24 | 100 | 882  | 36.2 | 0.72±0.05 |      |
| 5  | 25 | 62  | 882  | 36.2 | 0.48±0.03 | [9]  |
| 10 | 25 | 62  | 882  | 36.2 | 0.57±0.03 |      |
| 15 | 25 | 62  | 882  | 36.2 | 0.76±0.03 |      |
| 20 | 25 | 62  | 882  | 36.2 | 0.76±0.04 |      |
| 25 | 25 | 62  | 882  | 36.2 | 0.86±0.04 |      |
| 30 | 25 | 62  | 882  | 36.2 | 0.63±0.02 |      |
| 32 | 15 | 100 | 882  | 36   | 0.70±0.10 | [10] |
| 30 | 20 | 70  | 100  | 7    | 0.33±0.05 | [11] |
| 30 | 20 | 70  | 882  | 36   | 0.44±0.06 | [12] |
| 35 | 17 | 100 | 882  | 36   | 0.57      | [13] |
| 20 | 17 | 100 | 882  | 36   | 0.47      |      |
| 35 | 23 | 100 | 882  | 36   | 0.46      |      |
| 20 | 23 | 100 | 882  | 36   | 0.32      |      |
| 31 | 20 | 45  | 0    | 36   | 0.30±0.10 | [14] |
| 31 | 20 | 45  | 128  | 36   | 0.40±0.20 |      |
| 31 | 20 | 45  | 512  | 36   | 0.42±0.20 |      |
| 31 | 20 | 45  | 883  | 0    | 0.28±0.07 |      |
| 31 | 20 | 45  | 883  | 8    | 0.33±0.20 |      |
| 31 | 20 | 45  | 883  | 32   | 0.35±0.20 |      |
| 25 | 15 | 75  | 882  | 36.2 | 0.46±0.02 | [15] |
| 25 | 15 | 75  | 882  | 36.2 | 0.52±0.02 |      |
| 30 | 24 | 350 | 3    | 36.2 | 1.00±0.05 | [16] |
| 30 | 24 | 350 | 10   | 36.2 | 1.10±0.10 |      |
| 30 | 24 | 350 | 25   | 36.2 | 1.30±0.10 |      |
| 30 | 24 | 350 | 50   | 36.2 | 1.15±0.05 |      |
| 30 | 24 | 350 | 882  | 36.2 | 1.20±0.05 |      |
| 30 | 24 | 175 | 882  | 36.2 | 1.10±0.05 |      |
| 20 | 25 | 80  | 220  | 36.2 | 0.25±0.05 | [17] |
| 32 | 20 | 80  | 882  | 36   | 0.51      | [18] |
| 32 | 18 | 100 | 576  | 36.2 | 0.47±0.12 | [19] |
| 32 | 18 | 100 | 5    | 36.2 | 0.36±0.02 |      |
| 32 | 18 | 100 | 882  | 0.2  | 0.37±0.12 |      |
| 32 | 18 | 100 | 88.2 | 2.4  | 0.47±0.05 | [20] |
| 32 | 18 | 100 | 882  | 36.2 | 0.61±0.09 | [21] |
| 32 | 18 | 100 | 882  | 36.2 | 0.63±0.04 |      |
| 30 | 20 | 70  | 880  | 32   | 0.52      | [22] |

## References

1. Berges, J.A.; Franklin, D.J.; Harrison, P.J. Evolution of an artificial seawater medium: improvements in enriched seawater, artificial water over the last decades. *J Phycol* **2001**, *37*, 1138–1145, doi:doi.org/10.1046/j.1529-8817.2001.01052.x.
2. Guillard, R.R.; Ryther, J.H. Studies of marine planktonic diatoms. I. *Cyclotella nana* Hustedt, and *Detonula confervacea* (Cleve) Gran. *Can J Microbiol* **1962**, *8*, 229–239, doi:10.1139/m62-029.
3. Ono, K.; Khan, S.; Onoue, Y. Effects of temperature and light intensity on the growth and toxicity of *Heterosigma akashiwo* (Raphidophyceae). *Aquac Res* **2000**, *31*, 427–433, doi:10.1046/j.1365-2109.2000.00463.x.
4. Haque, S.M.; Onoue, Y. Effects of Salinity on Growth and Toxin Production of a Noxious Phytoflagellate, *Heterosigma akashiwo* (Raphidophyceae). *Bot Mar* **2002**, *45*, 356–363, doi:10.1515/BOT.2002.036.
5. Li, D.; Cong, W.; Cai, Z.; Shi, D.; Ouyang, F. Response of growth and photosynthesis of marine red tide alga *Heterosigma akashiwo* to iron and iron stress condition. *Biotechnol Lett* **2002**, *24*, 743–747, doi:10.1023/A:1015202620931.
6. Zhang, Y.; Fu, F.; Whereat, E.; Coyne, K.J.; Hutchins, D.A. Bottom-up controls on a mixed-species HAB assemblage: A comparison of sympatric *Chattonella subsalsa* and *Heterosigma akashiwo* (Raphidophyceae) isolates from the Delaware Inland Bays, USA. *Harmful Algae* **2006**, *5*, 310–320, doi:10.1016/j.hal.2005.09.001.
7. Herndon, J.; Cochlan, W.P. Nitrogen utilization by the raphidophyte *Heterosigma akashiwo*: Growth and uptake kinetics in laboratory cultures. *Harmful Algae* **2007**, *6*, 260–270, doi:10.1016/j.hal.2006.08.006.
8. Fu, F.; Zhang, Y.; Warner, M.E.; Feng, Y.; Sun, J.; Hutchins, D.A. A comparison of future increased CO<sub>2</sub> and temperature effects on sympatric *Heterosigma akashiwo* and *Prorocentrum minimum*. *Harmful Algae* **2008**, *7*, 76–90, doi:10.1016/j.hal.2007.05.006.
9. Kempton, J.; Keppler, C.J.; Lewitus, A.; Shuler, A.; Wilde, S. A novel *Heterosigma akashiwo* (Raphidophyceae) bloom extending from a South Carolina bay to offshore waters. *Harmful Algae* **2008**, *7*, 235–240, doi:10.1016/j.hal.2007.08.003.
10. Tillmann, U.; Hansen, P.J. Allelopathic effects of *Alexandrium tamarense* on other algae: evidence from mixed growth experiments. *Aquat Microb Ecol* **2009**, *57*, 101–112, doi:10.3354/ame01329.
11. Wang, Y.; Zhou, B.; Tang, X. Effects of two species of macroalgae—*Ulva pertusa* and *Gracilaria lemaneiformis*—on growth of *Heterosigma akashiwo* (Raphidophyceae). *J Appl Phycol* **2009**, *21*, 375–385, doi:10.1007/s10811-008-9380-y.
12. Da, X.U.; Bin, Z.; You, W.; Qing, J.U.; Qingyun, Y.U.; Xuexi, T. Effect of CO<sub>2</sub> enrichment on competition between *Skeletonema costatum* and *Heterosigma akashiwo*. *Chin J Oceanol Limn* **2010**, *28*, 933–939, doi:10.1007/s00343-010-9071-9.
13. Martínez, R.; Orive, E.; Laza-Martínez, A.; Seoane, S. Growth response of six strains of *Heterosigma akashiwo* to varying temperature, salinity and irradiance conditions. *J Plankton Res* **2010**, *32*, 529–538, doi:10.1093/plankt/fbp135.
14. Ge, W.; Yin, X.; Chai, C.; Zhang, J. Bioaccumulation of PBDE congener 2,2',4,4'-tetrabromodiphenyl ether by *Heterosigma akashiwo* in response to different nutrient concentrations. *Oceanol Hydrobiol St* **2013**, *42*, 139–148, doi:10.2478/s13545-013-0067-x.
15. Kim, H.; Spivack, A.J.; Menden-Deuer, S. pH alters the swimming behaviors of the raphidophyte *Heterosigma akashiwo*: Implications for bloom formation in an acidified ocean. *Harmful Algae* **2013**, *26*, 1–11, doi:10.1016/j.hal.2013.03.004.
16. Kok, J.W.K.; Yeo, D.C.J.; Leong, S.C.Y. Growth and physiological responses of a tropical toxic marine microalga *Heterosigma akashiwo* (Heterokontophyta: Raphidophyceae) from Singapore waters to varying nitrogen sources and light conditions. *Ocean Sci J* **2015**, *50*, 491–508, doi:10.1007/s12601-015-0045-x.
17. Stewart, J.J.; Bianco, C.M.; Miller, K.R.; Coyne, K.J. The Marine Microalga, *Heterosigma akashiwo*, Converts Industrial Waste Gases into Valuable Biomass. *Frontiers in Energy Research* **2015**, *3*, 12, doi:10.3389/fenrg.2015.00012.
18. Wang, Z.; Liang, Y. Growth and alkaline phosphatase activity of *Chattonella marina* and *Heterosigma akashiwo* in response to phosphorus limitation. *J Environ Sci-China* **2015**, *28*, 1–7, doi:10.1016/j.jes.2014.04.015.
19. Haley, S.T.; Alexander, H.; Juhl, A.R.; Dyhrman, S.T. Transcriptional response of the harmful raphidophyte *Heterosigma akashiwo* to nitrate and phosphate stress. *Harmful Algae* **2017**, *68*, 258–270, doi:10.1016/j.hal.2017.07.001.
20. Hennon, G.M.M.; Hernández Limón, M.D.; Haley, S.T.; Juhl, A.R.; Dyhrman, S.T. Diverse CO<sub>2</sub>-Induced Responses in Physiology and Gene Expression among Eukaryotic Phytoplankton. *Front Microbiol* **2017**, *8*, 2547, doi:10.3389/fmicb.2017.02547.
21. Hennon, G.M.M.; Williamson, O.M.; Hernández Limón, M.D.; Haley, S.T.; Dyhrman, S.T. Non-linear Physiology and Gene Expression Responses of Harmful Alga *Heterosigma akashiwo* to Rising CO<sub>2</sub>. *Protist* **2019**, *170*, 38–51, doi:10.1016/j.protis.2018.10.002.
22. Wang, R.; Xue, Q.; Wang, J.; Tan, L. Competitive interactions between two allelopathic algal species: *Heterosigma akashiwo* and *Phaeodactylum tricornutum*. *Mar Biol Res* **2020**, *16*, 32–43, doi:10.1080/17451000.2019.1702213.
